# Supplementary material
Source: PubMed Central journal article supplement (PMC2753399)

### AGP1: P02763

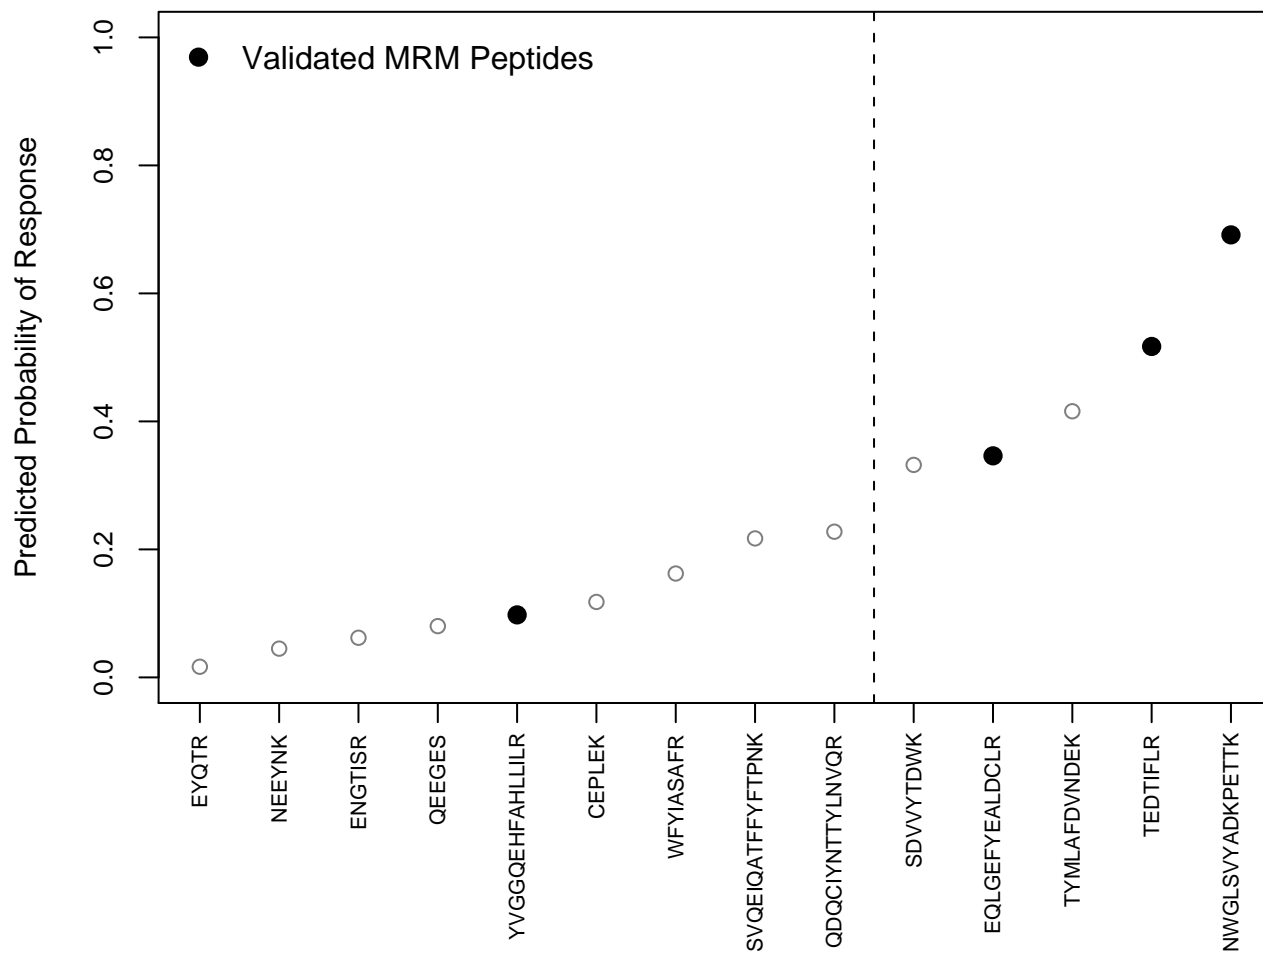

### CD40: P29965

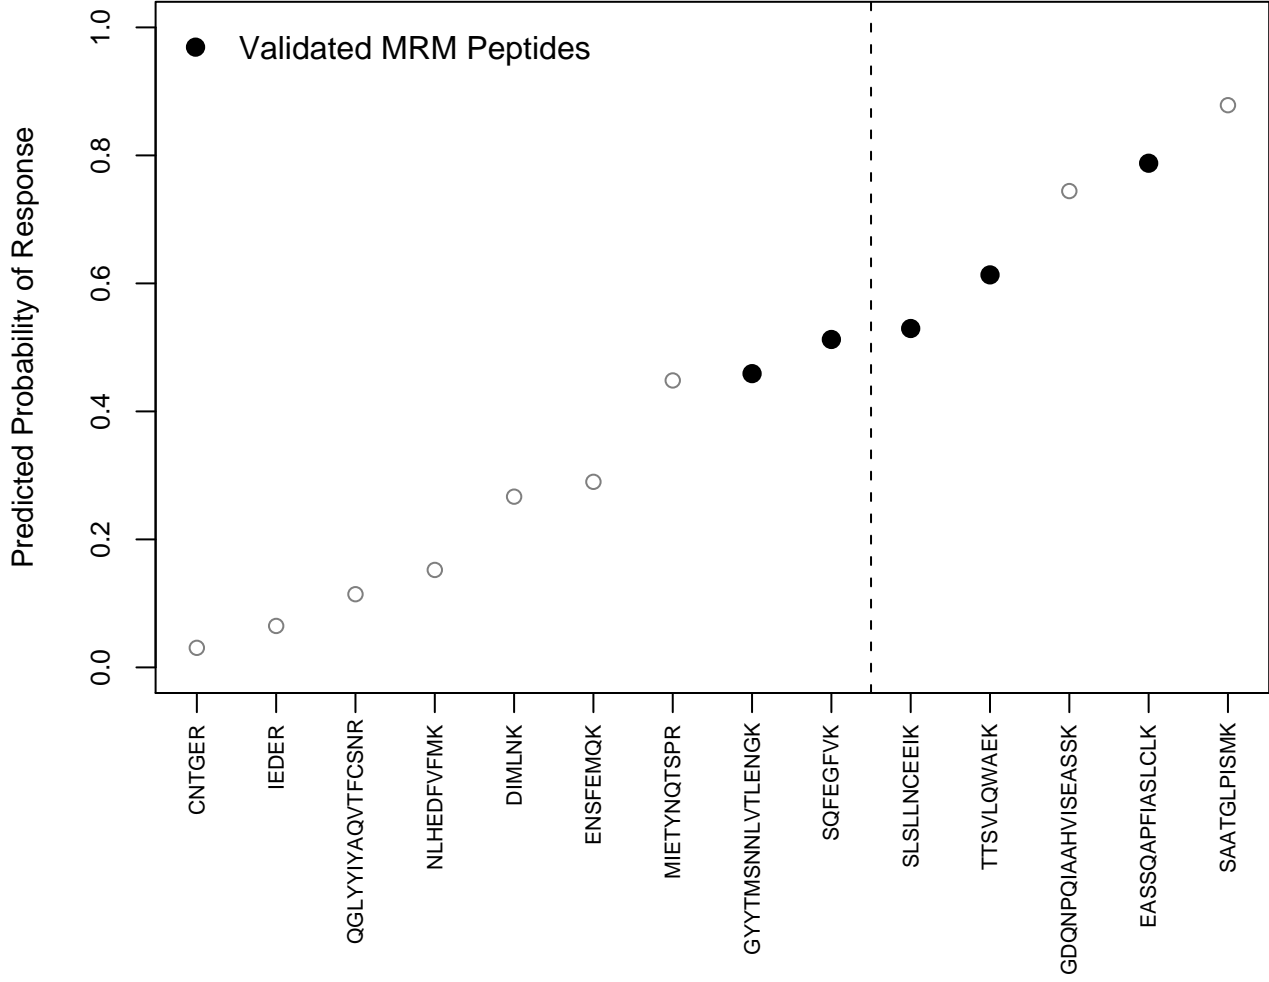

# CRP: P02741

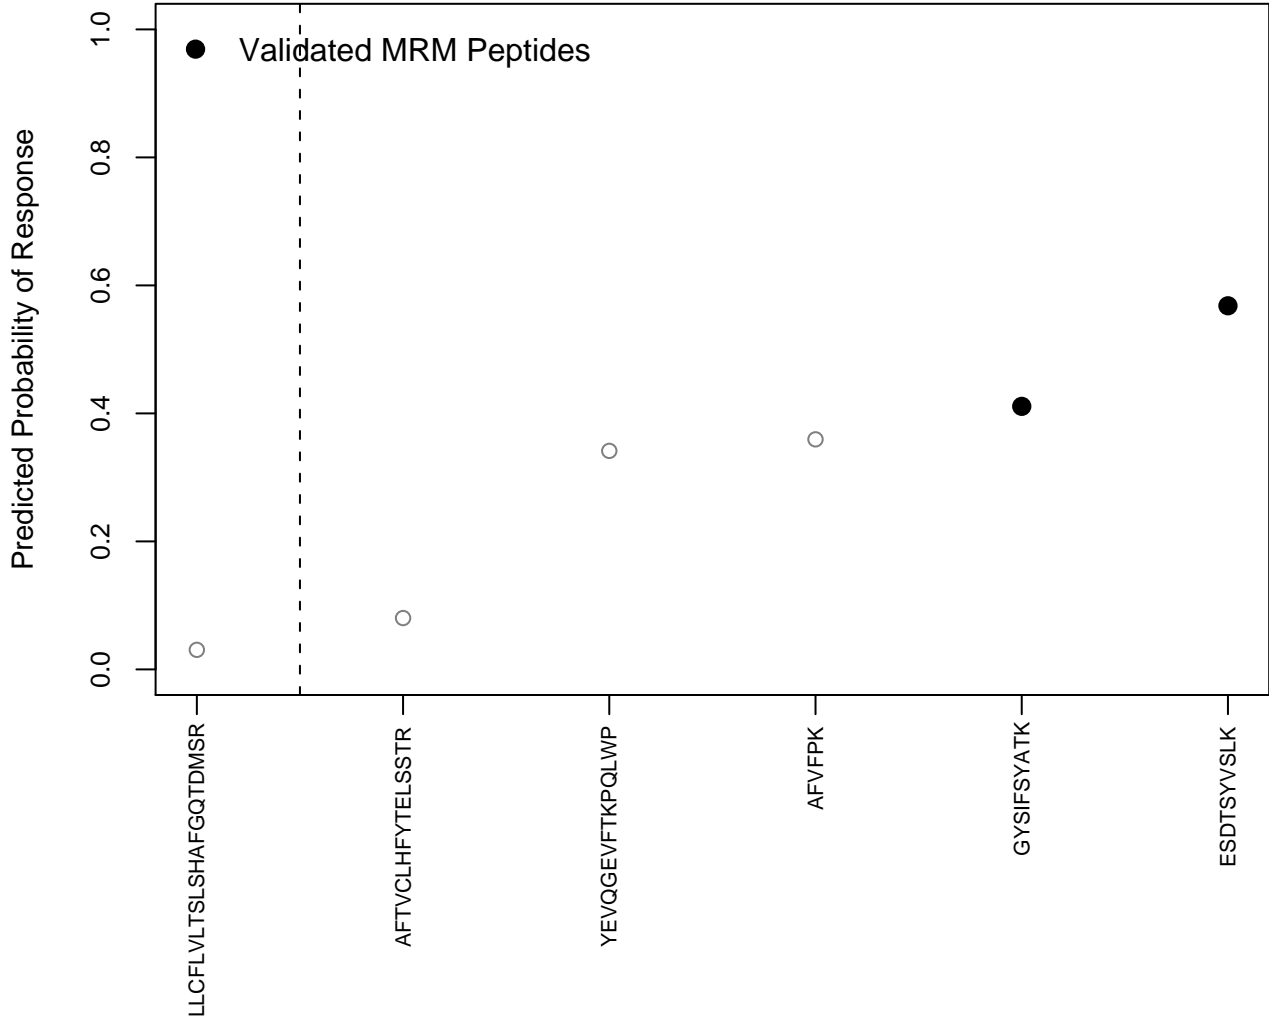

# HRP: P00433

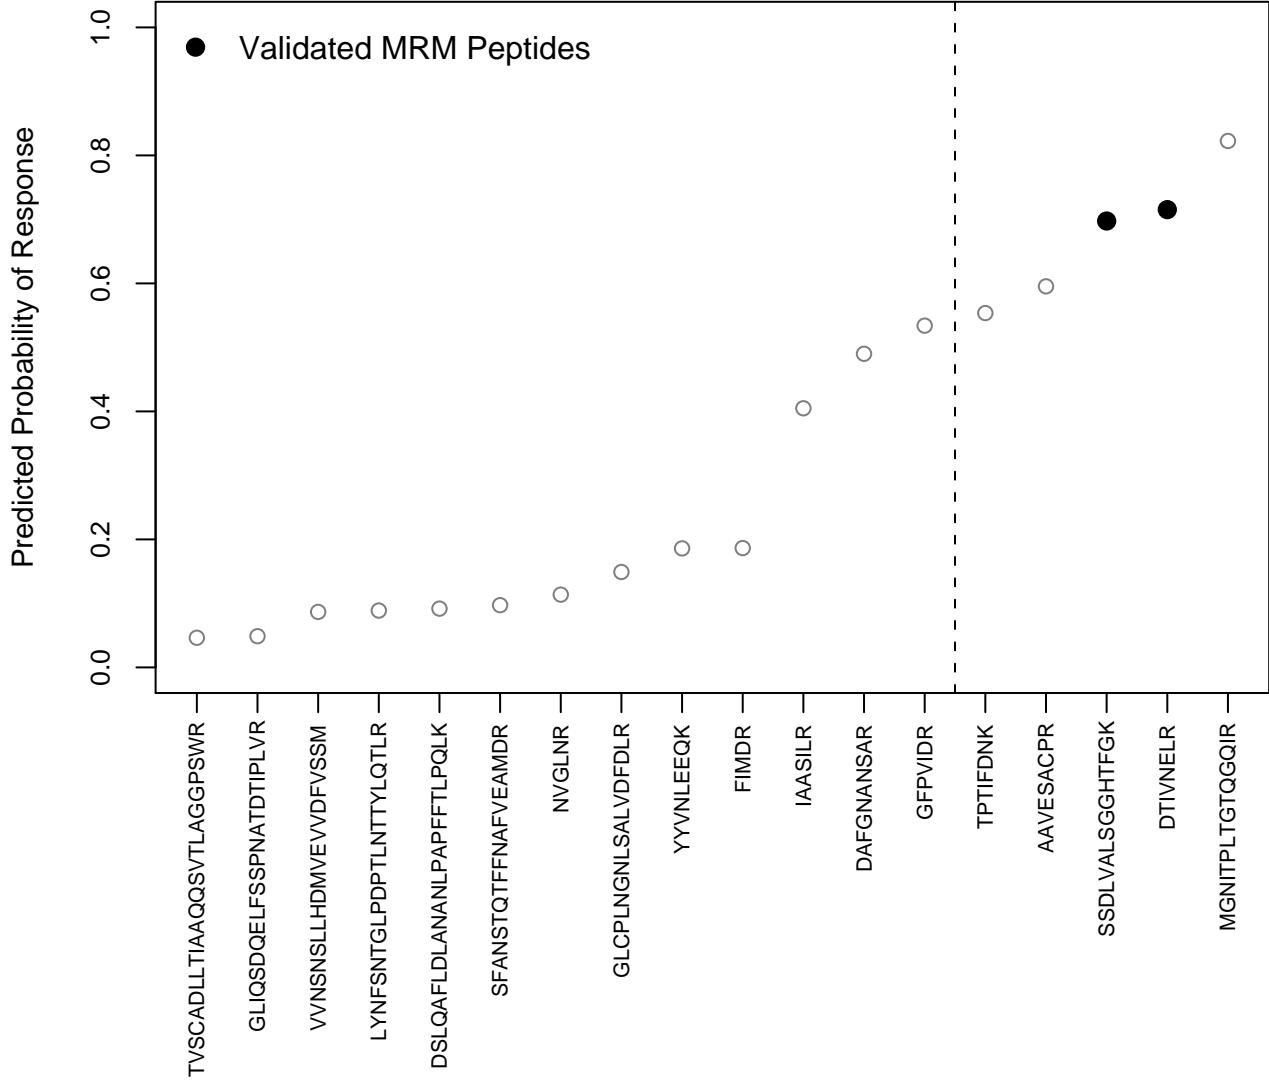

IL-33: O95760

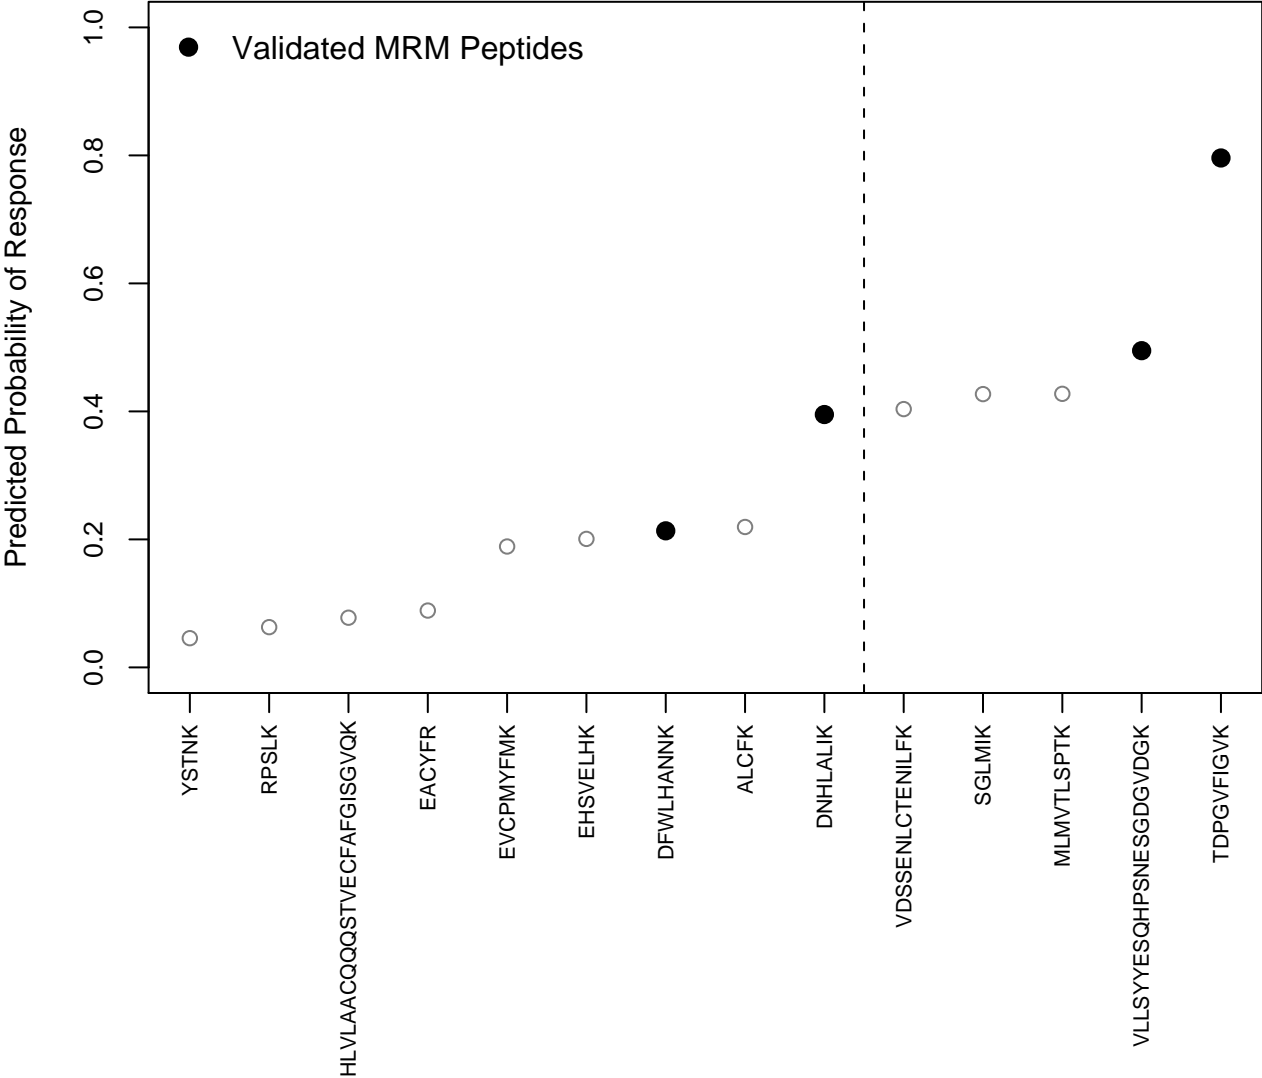

# Leptin: P41160

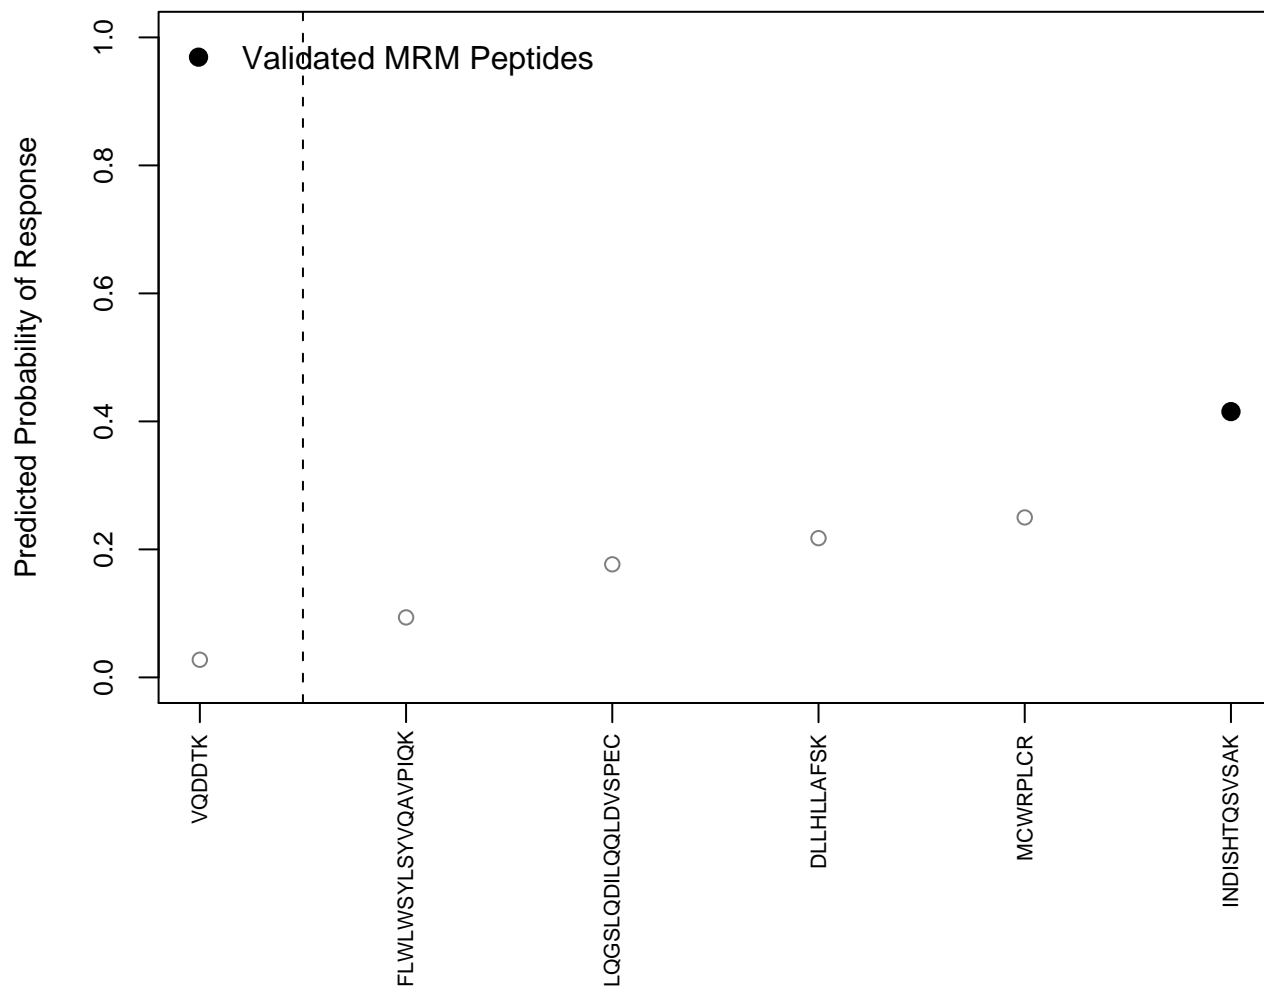

# MBP: P02687

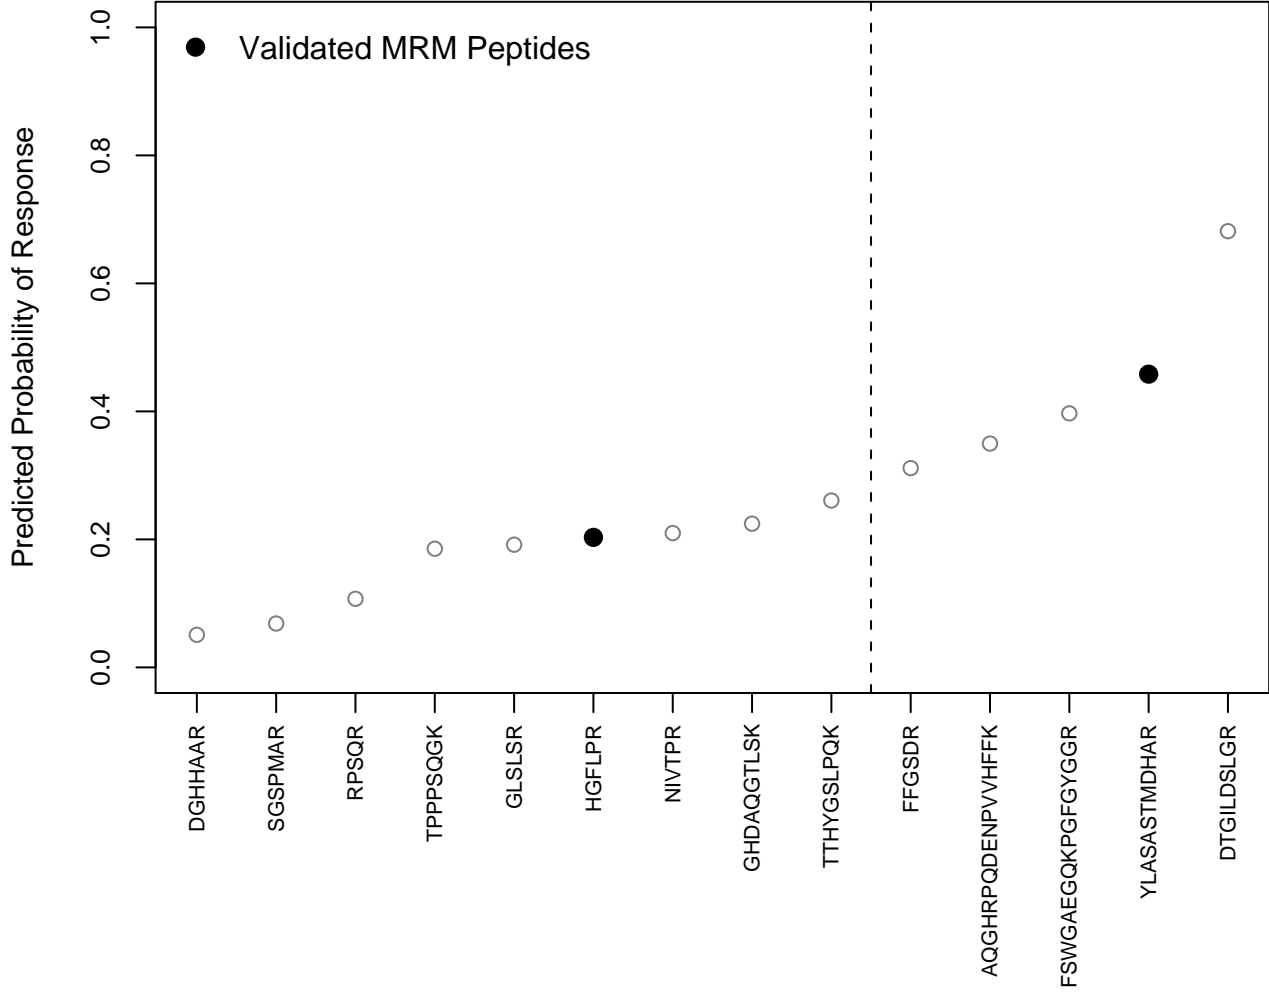

# MPO: P05164

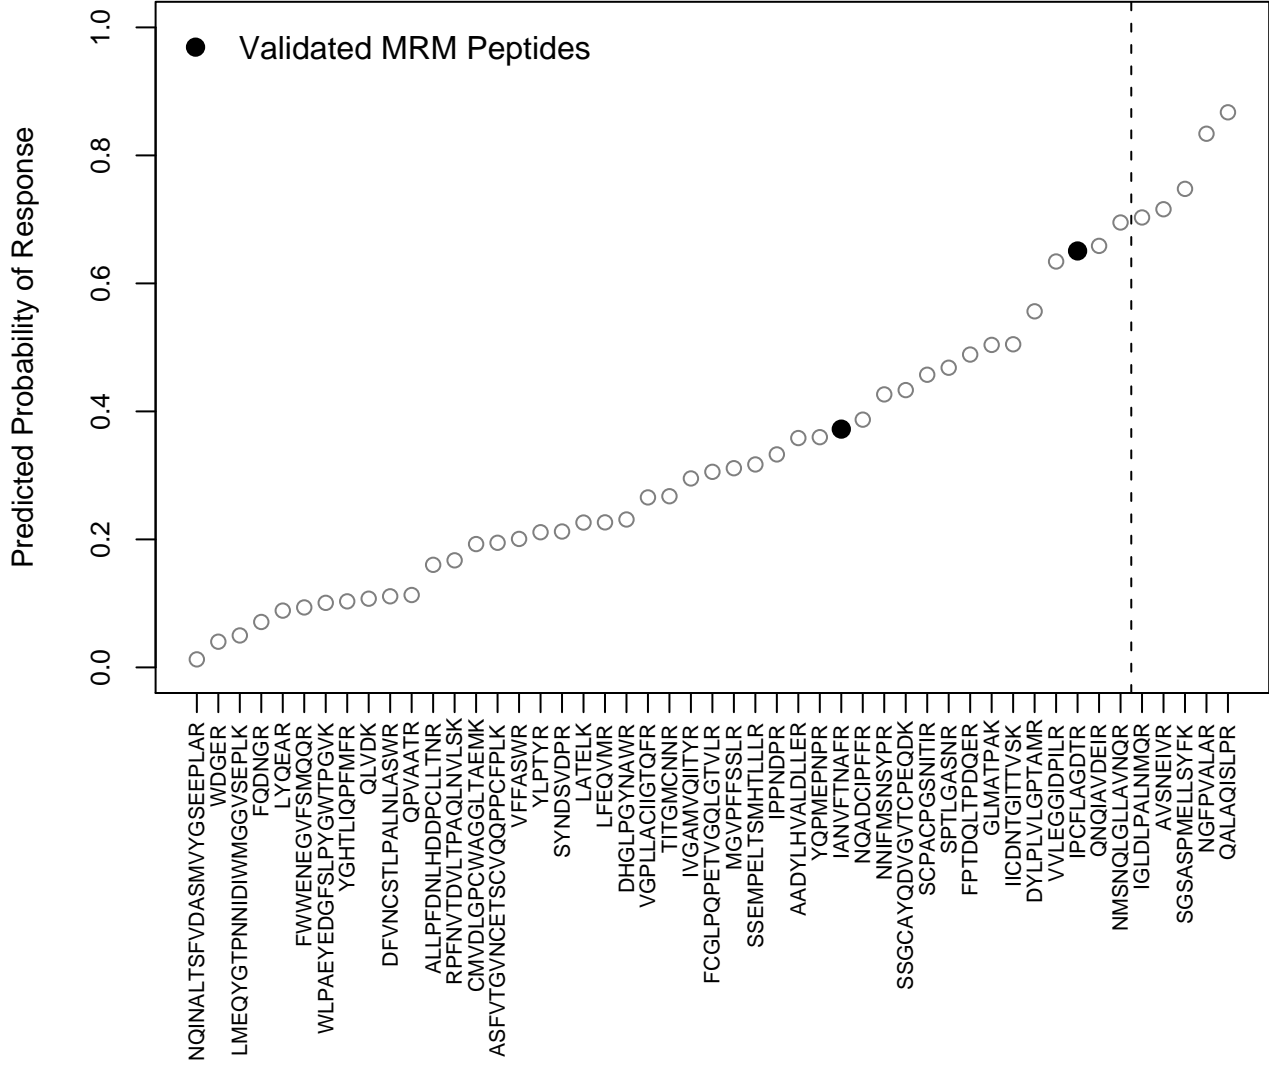



### MRP-14: P06702

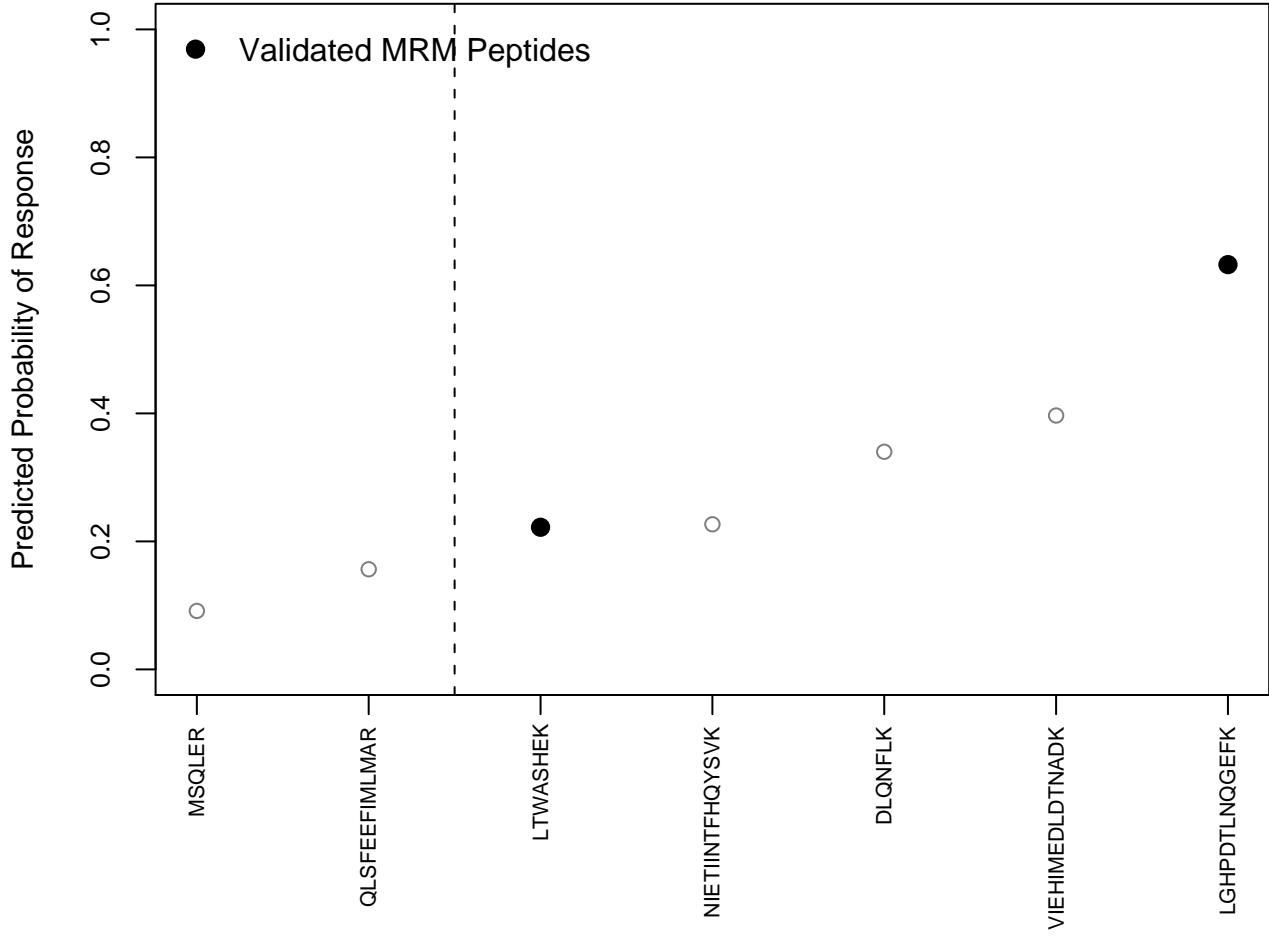

### Myoglobin: P68082

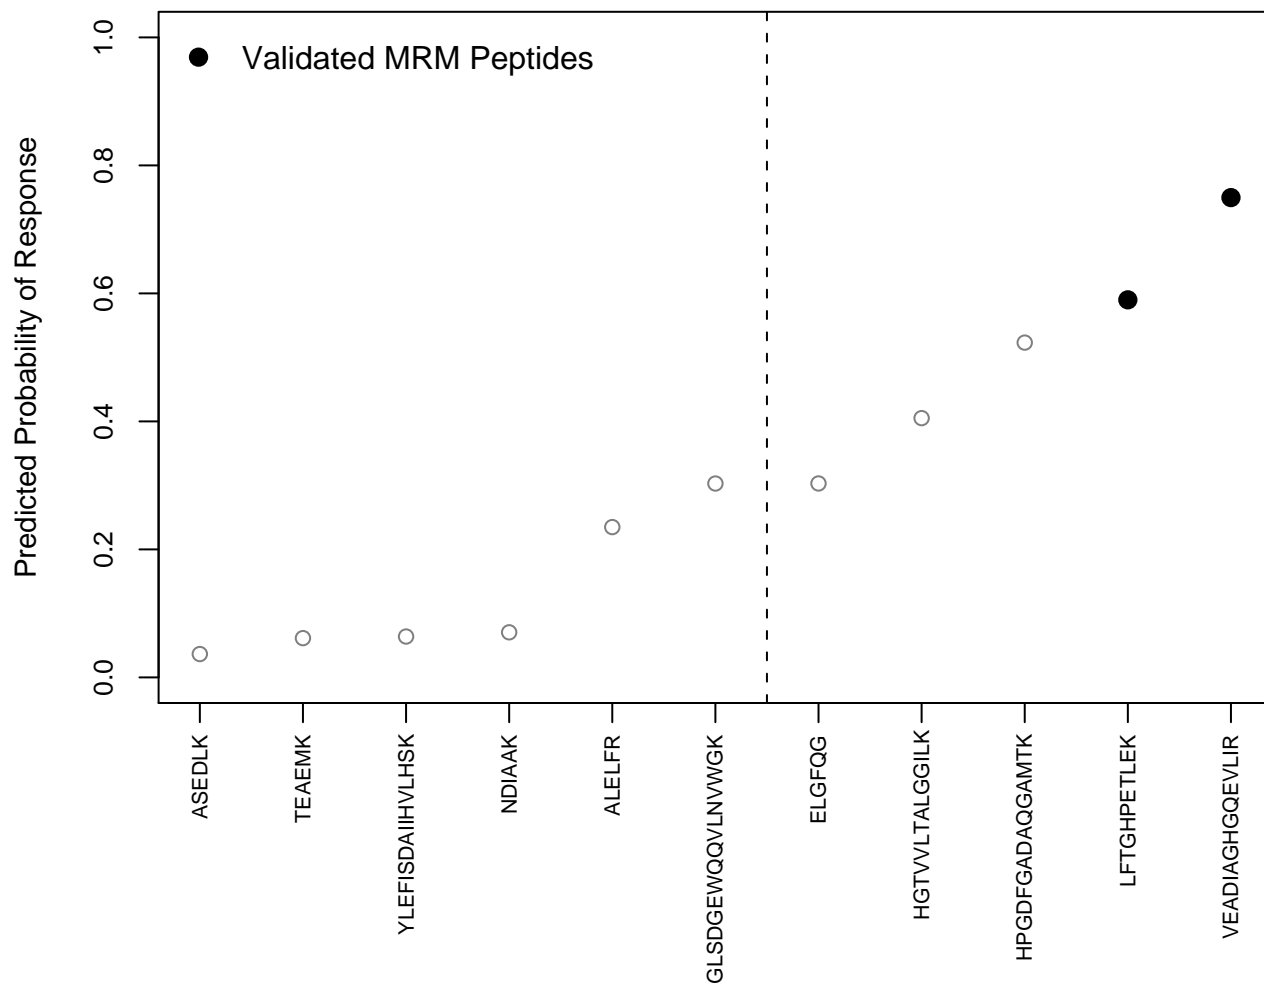

### BNP: P16860

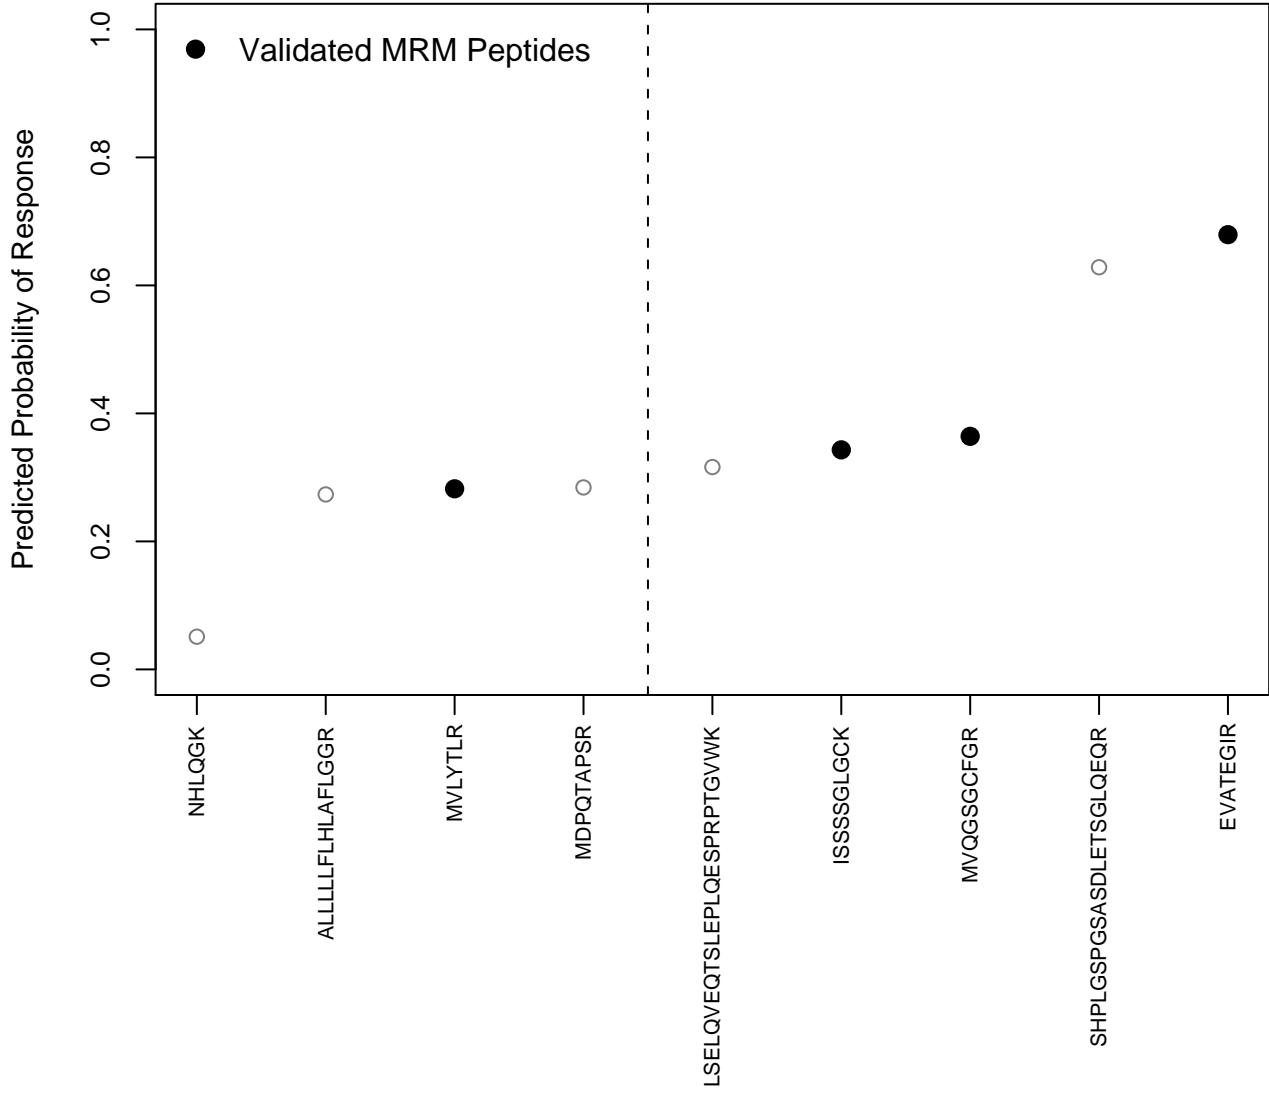

### PSA: P07288

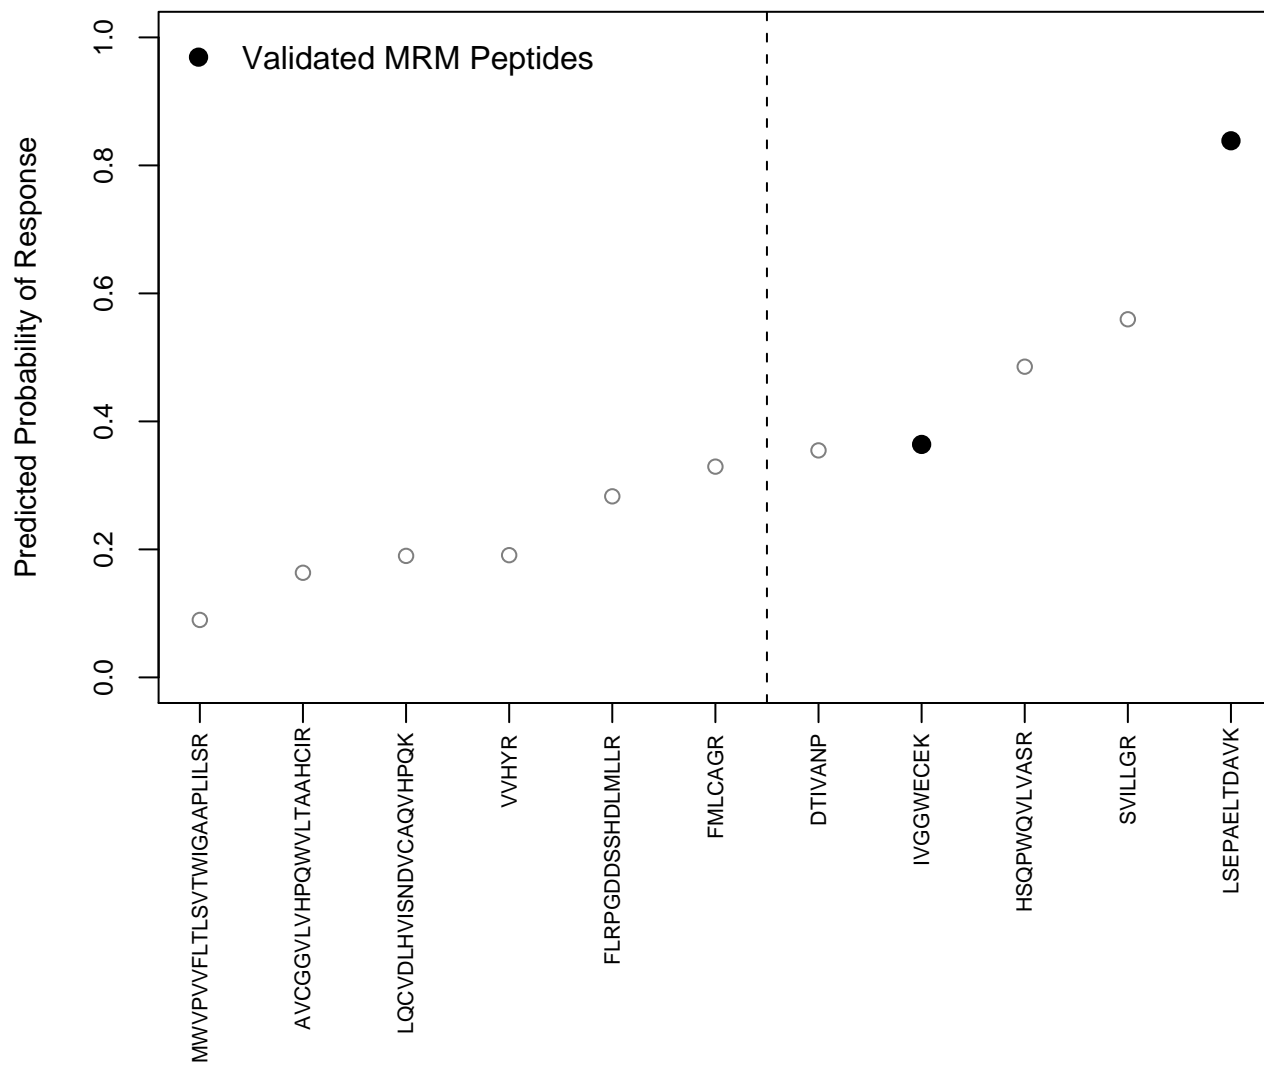

# Troponin I: P19429

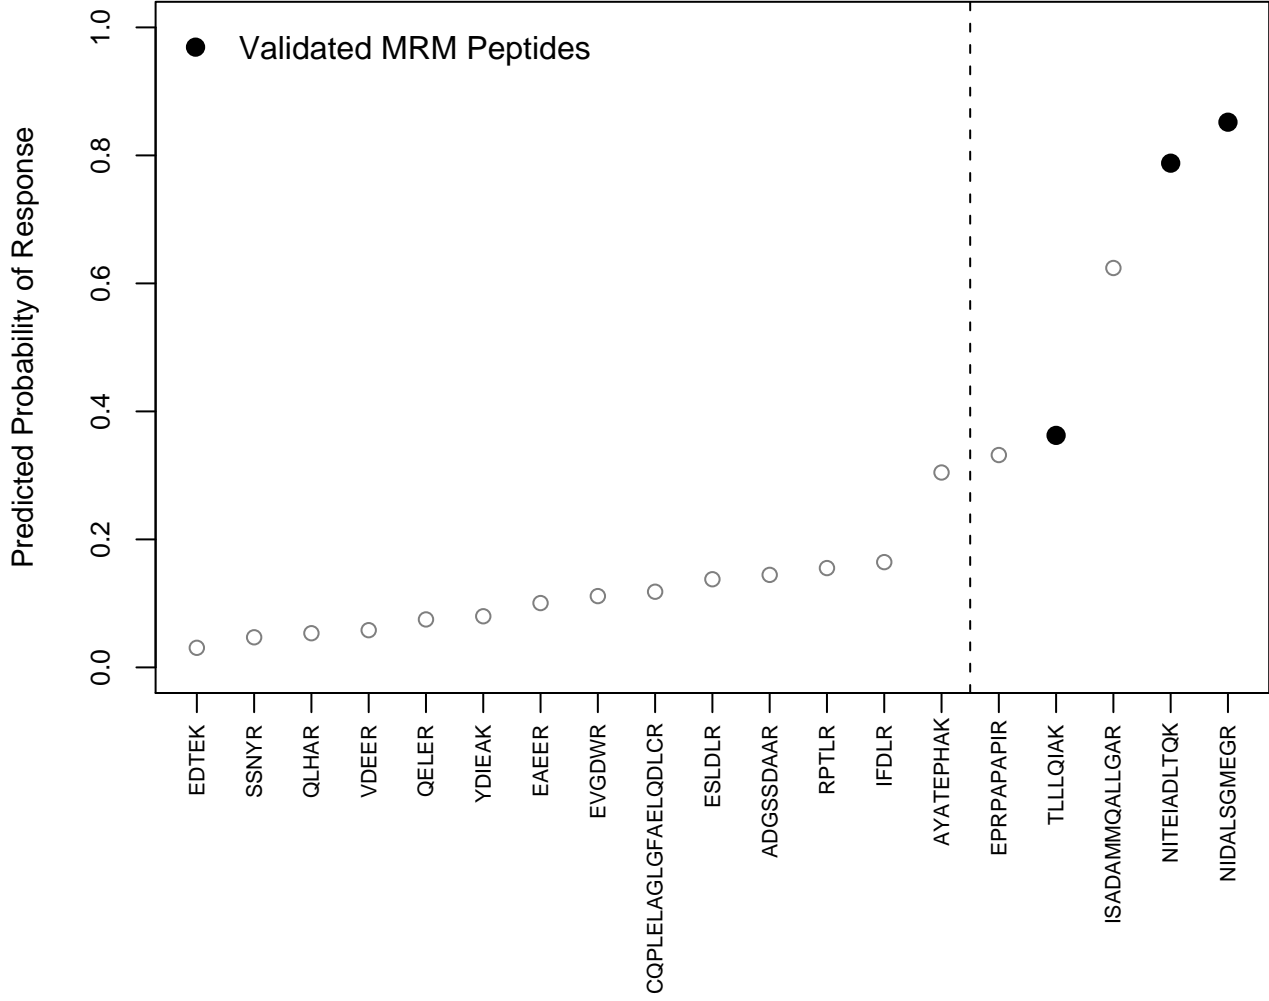

# Troponin T: P45379

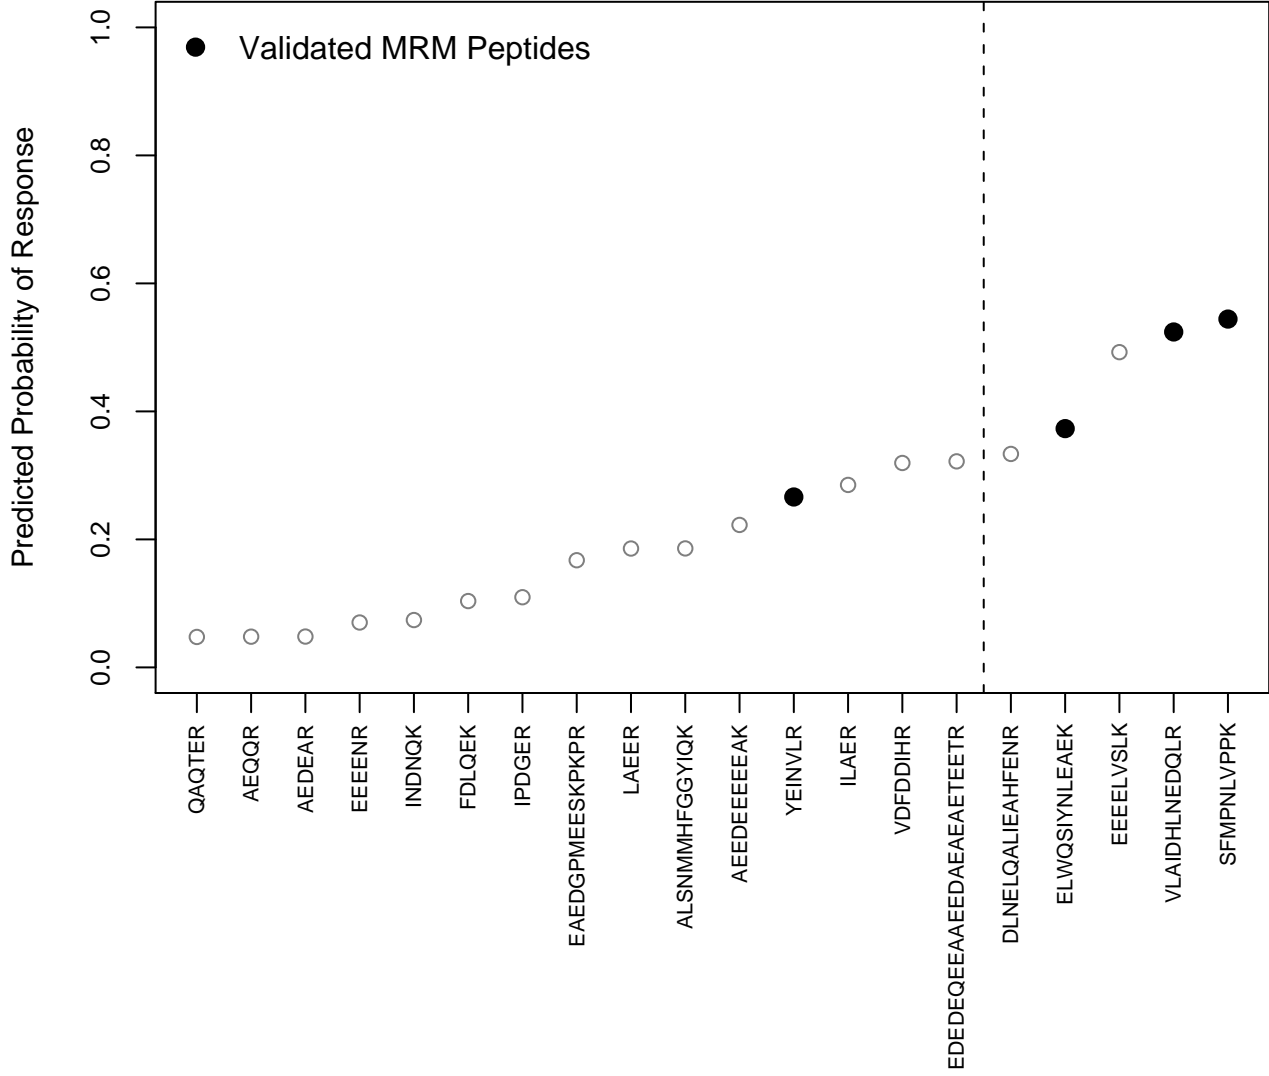

Supplement: NIHMS108501-supplement-Supplementary_Data.pdf [file NIHMS108501-supplement-Supplementary_Data.pdf]
